# Supplementary material for: Time matters for macroscopic membranes formed by alginate and cationic β-sheet peptides
Source: Royal Society of Chemistry journal article supplement (doi:10.1039/d0sm01197e), 2020-01-01
Supplement: d0sm01197e1.pdf [file d0sm01197e1.pdf]

## **Supporting information**

To

Time matters for macroscopic membranes formed by alginate and  
cationic  $\beta$ -sheet peptides

Gal Yosefi, †<sup>1</sup> Topaz Levi, ‡<sup>1</sup> Hanna Rapaport, ‡<sup>1\*</sup> Ronit Bitton†<sup>1\*\*</sup>

†Department of Chemical Engineering Ben-Gurion University of the Negev, Beer-Sheva 84105, Israel.

‡Avram and Stella Goldstein-Goren Department of Biotechnology Engineering, Ben-Gurion University  
of the Negev, Beer-Sheva 84105, Israel

|Ilse Katz Institute for Nanoscale Science and Technology (IKI), Ben-Gurion University of the Negev,  
Beer-Sheva 84105, Israel

## The membranes notation

For the sake of brevity, these different membrane systems are described using **XpYdZM** notation (Table S1); where X = **F** or **A** denoting fresh or the 4 days aged PFK solution, respectively, Y is either 1 or 6 standing for the membrane ageing time in days, and Z assigns **S** or **P** for the membrane type (SMs and PMs respectively).

**Table S1** - The abbreviated names of the membranes used in this study

| Peptide age [days] | Membrane age [days] | Membrane shape | Membrane name |
|--------------------|---------------------|----------------|---------------|
| 1                  | 1                   | Planar         | Fp1dPM        |
| 4                  | 1                   | Planar         | Ap1dPM        |
| 1                  | 1                   | Spherical      | Fp1dSM        |
| 4                  | 1                   | Spherical      | Ap1dSM        |
| 1                  | 6                   | Planar         | Fp6dPM        |
| 4                  | 6                   | Planar         | Ap6dPM        |
| 1                  | 6                   | Spherical      | Fp6dSM        |
| 4                  | 6                   | Spherical      | Ap6dSM        |

## The osmotic pressure of the peptide solution surrounding the sac and membrane over time:

The osmolality of the solutions was measured using an osmometer (Osmomat 030, Gonotec). This apparatus determines the total osmolality of an aqueous solution by measuring its freezing point compared to a calibration solution.

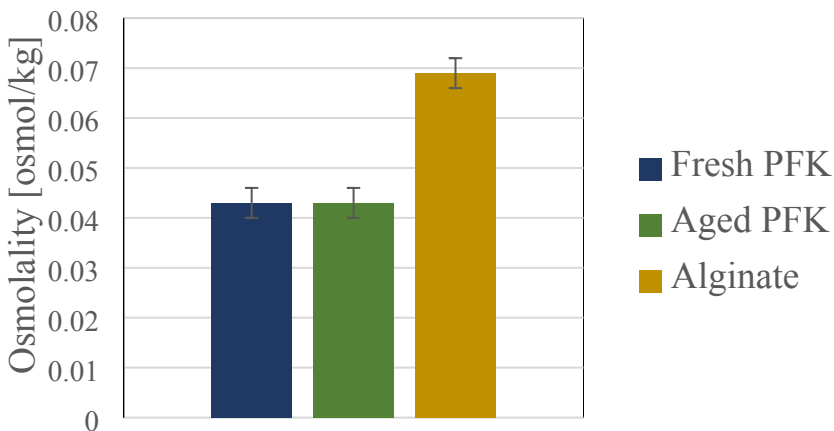

**Figure S1** - The osmotic pressure of the PFK solution surrounding the membranes

**The zeta potential of fresh and aged peptide solutions and the alginate solution:**

Zeta potential of the peptide and the alginate were determined using Zetasizer Nano ZS (Malvern Instruments Ltd., Malvern, UK), by measuring 0.1wt% solutions.

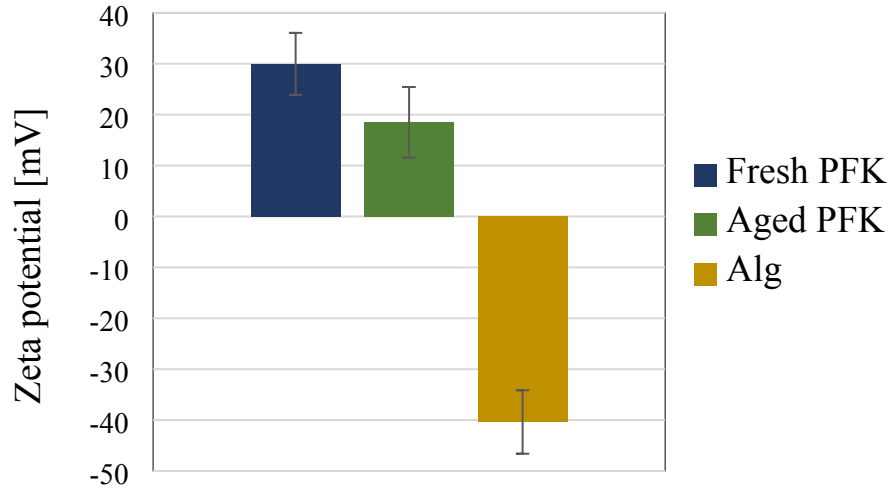

**Figure S2** - The Zeta potential of 0.1wt% PFK and alginate solutions

**The diffusion coefficient of fresh and aged PFK solutions.**

The diffusion coefficients were determined by performing a DLS experiment using Zetasizer Nano ZS (Malvern Instruments Ltd., Malvern, UK). The D was extracted using the instrument's software.

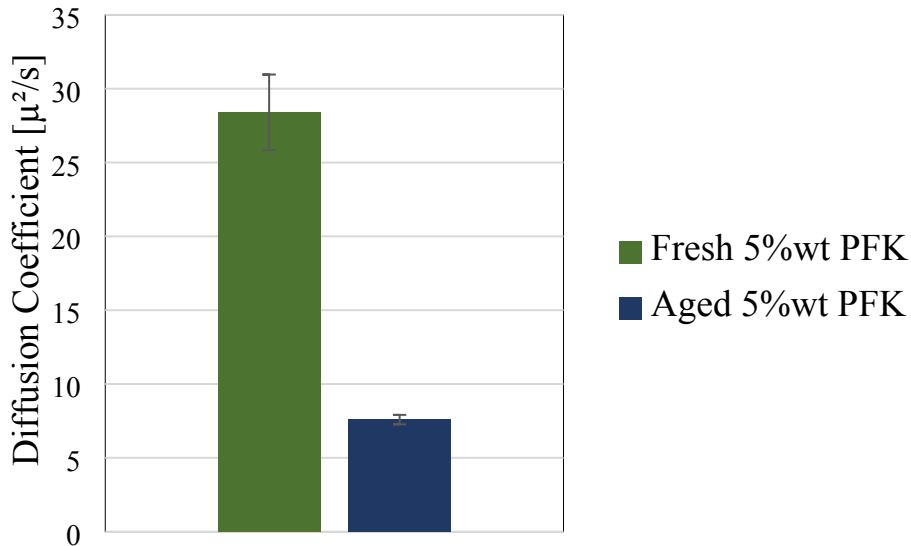

**Figure S3** - The diffusion coefficient of the aged and fresh PFK solutions

## Surface to volume ratio in spherical and planar membranes:

Spherical membranes:

The SMs volume is determined by the volume of the Alginate drop

$$V_{SM} = 30\mu l = 30 \cdot 10^{-3} cm^3$$
$$= \frac{4\pi r^3}{3} \Rightarrow r = 0.193 cm$$

$$S_{SM} = 4\pi r^2 = 0.467 cm^2$$

$$S/V_{SM} = 15.6 cm^{-1}$$

In order to be consistent the volume of the PMs was defined as well by the volume of the alginate

Planar membranes:

$$V_{PM} = 100\mu l = 100 \cdot 10^{-3} cm^3$$

$$S_{PM} = \pi r^2 \cong \pi 0.4^2 cm^2 = 0.5 cm^2$$

$$S/V_{PM} = 5 cm^{-1}$$

## Diffusion length of the membranes

Spherical membrane:

Diffusion length is the radius of the spherical membrane, therefore:

$$r = 0.193 cm \cong 0.2 cm$$

Planar membrane:

Diffusion length is the thickness of the membrane, therefore:

$$S/V_{PM} = \frac{\pi r^2}{\pi r^2 h} = \frac{1}{h} = 5 cm^{-1} \Rightarrow h = 0.2 cm$$

## The effect of curvature on the the alignment of the perpendicular fibers

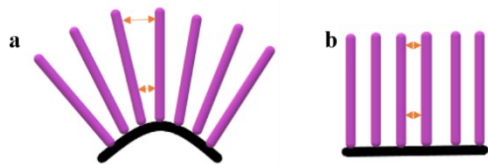

**Figure S4** - a schematic representation of the effect of the membrane curvature on the alignment of the perpendicular fibers

**The stability of the membranes in acetate and carbonate buffer solution**

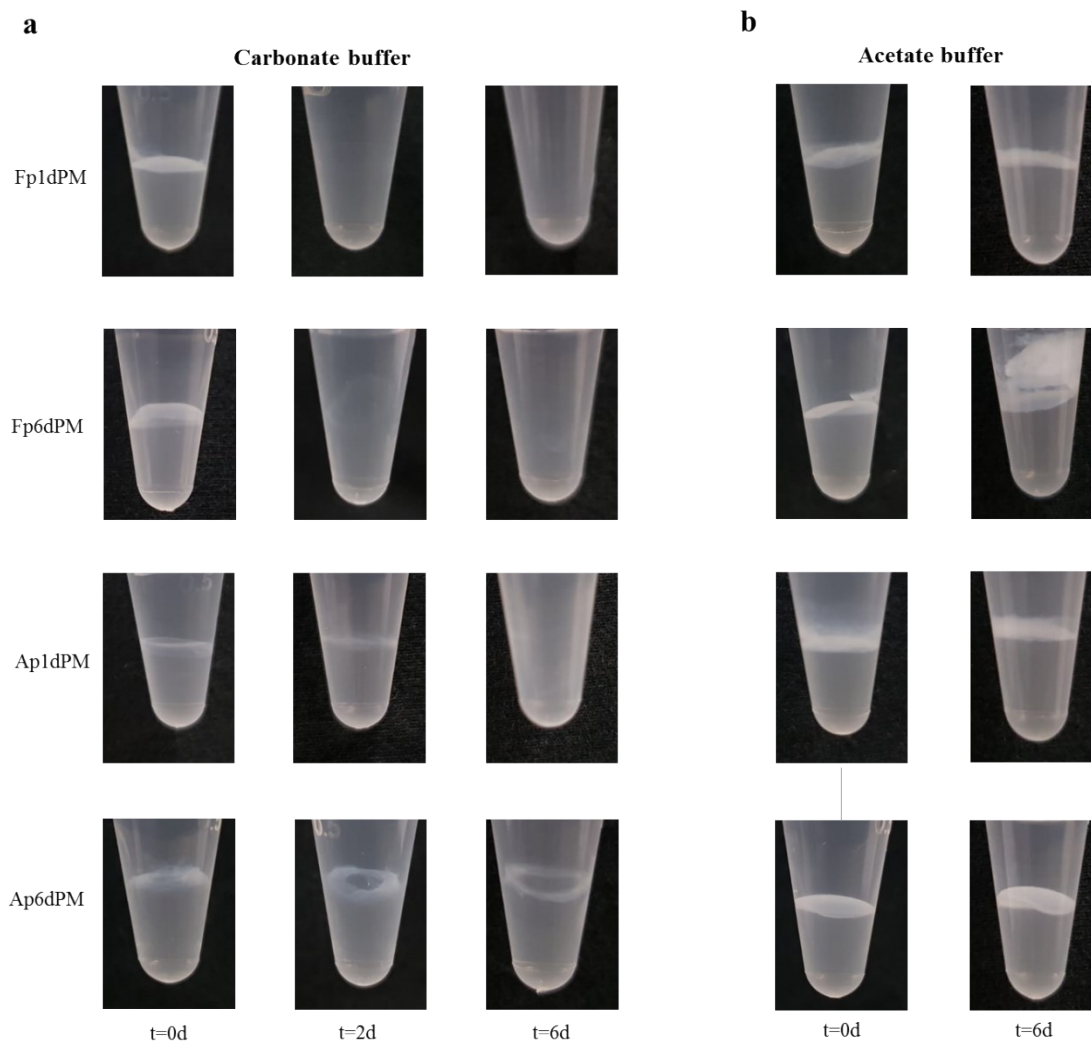

**Figure S5** - images of the 4 types of membranes in carbonate buffer (a) and acetate buffer (b) over time.

**Initial mass of PFK in the membranes**

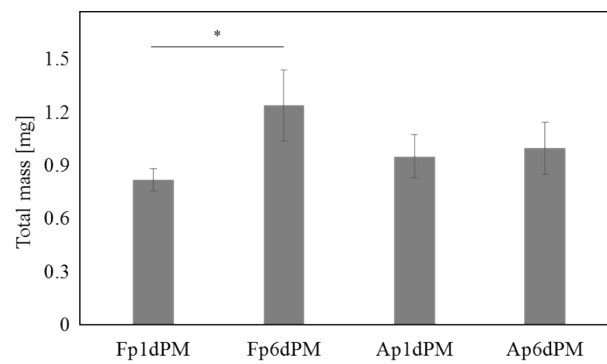

**Figure S6** –initial mass of the PFK in the 4 types of membranes in PBS solution.
